# Supplementary material
Source: publisher figshare collection journal article supplement (https://acs.figshare.com/ndownloader/files/4496257)
Supplement: Supplementary file 1 [file 4496257]

## Electronic Supporting Information

### Hierarchical ZnO nanorod-assembled hollow superstructures for catalytic and photoluminescence applications

Jingzhou Yin, Qingyi Lu, Zhinan Yu, Jianjun Wang, Huan Pang, Feng Gao

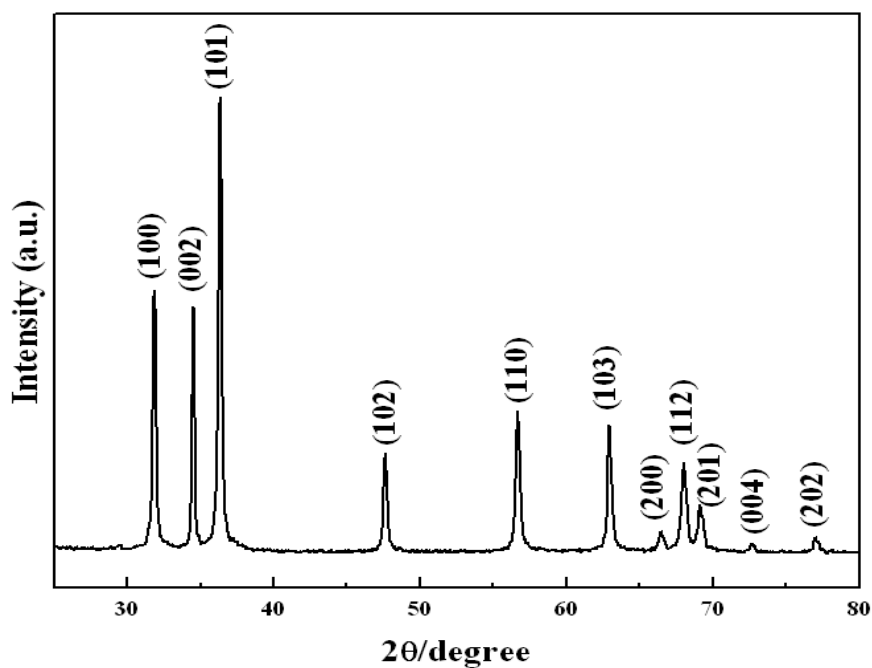

Fig. S11. XRD pattern of the double-cage nanorod-assembled superstructures.

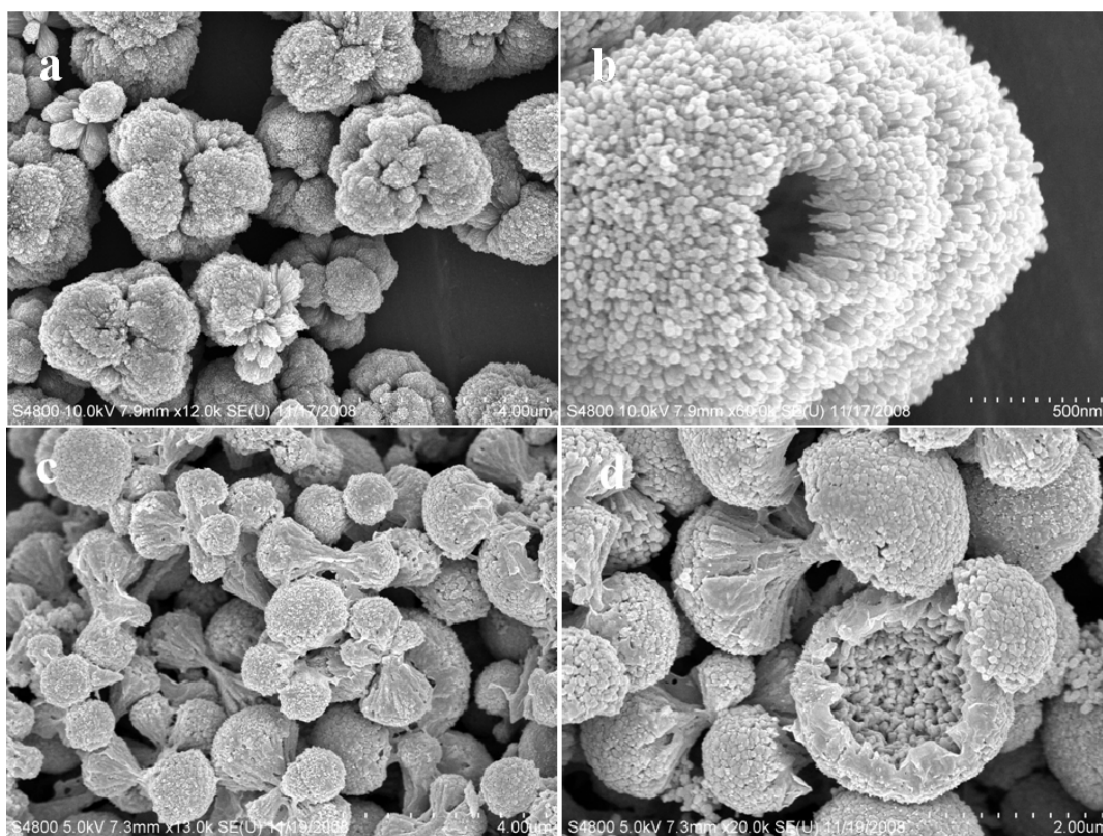

Fig. SI2 (a, b) SEM images of the connected-cage nanorod-assembled superstructures; (c, d) SEM image of the sample prepared with low ammonia amount (1.6 ml) at 200 °C for 12 h.

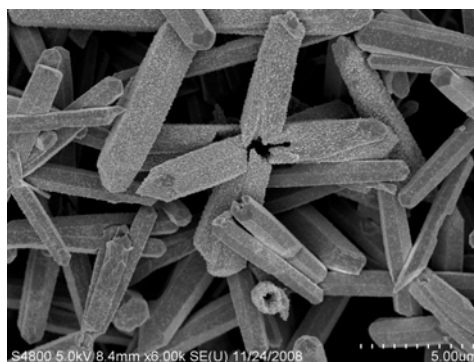

Fig. SI3 The SEM image of ZnO samples obtained without CMC at 120 °C under hydrothermal conditions

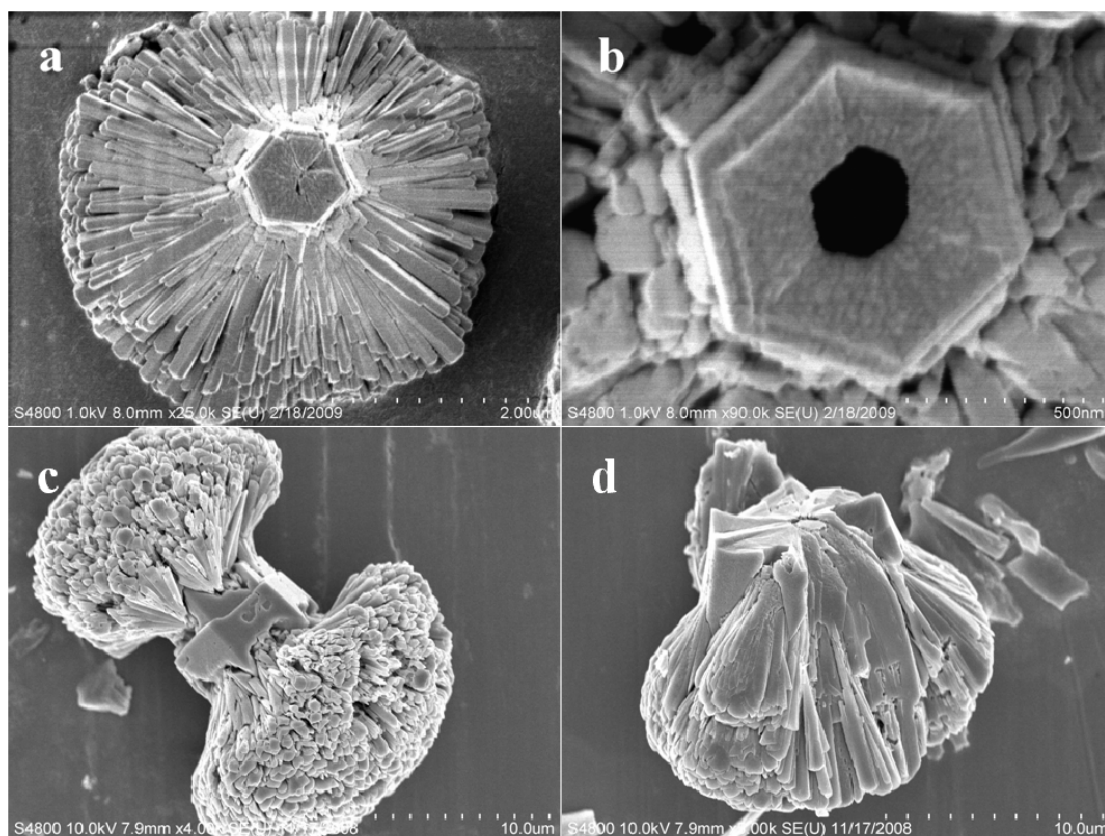

Fig. SI4 (a, b) SEM images of the sample prepared with low ammonia amount (1.6 mL) at 80 °C for 12 h; (c, d) SEM images of the sample prepared without the addition of ammonia.
